# Supplementary material for: Laid-back breastfeeding: knowledge, attitudes and practices of midwives and student midwives in Ireland
Source: Springer Nature journal article supplement (doi:10.1186/s13006-024-00619-y), 2024-02-19
Supplement: MOESM1 [file 26749590]

Laid-back Breastfeeding Questionnaire for Midwives and Student Midwives in Ireland

Thank you for agreeing to complete the survey

Laid-back Breastfeeding

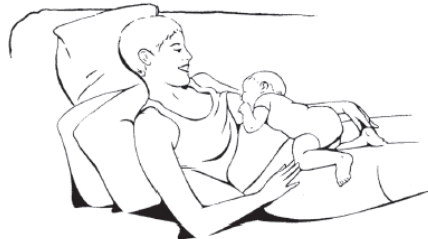

\* Image Credit: La Leche League International

Laid-back breastfeeding is a baby-driven approach to positioning. The mother leans back into a semi-reclined position and the baby rests tummy down, hands free on her body with the mother's arms acting as guardrails. This survey aims to explore what midwives and student midwives in Ireland know and think about this position and if/how they use it in their practice. There are 16 short questions to complete, which should take about 5 minutes.

**Please tick appropriate box**

1. What is your title?
  - a. Staff midwife \_\_\_\_\_
  - b. Clinical Midwife Manager \_\_\_\_\_
  - c. Student midwife \_\_\_\_\_
  - d. Other (please specify) \_\_\_\_\_
  
2. By which educational route did you become/are you becoming a midwife?  
Please select one.
  - a. Direct entry - BSc (Hons) in Midwifery degree \_\_\_\_\_
  - b. Post General Nursing \_\_\_\_\_
  
3. a. How many years have you been a qualified midwife?
  - a. 0-3 years \_\_\_\_\_
  - b. 4-6 years \_\_\_\_\_
  - c. 7-9 years \_\_\_\_\_
  - d. 10+ years \_\_\_\_\_

**OR**

- b. What stage of your programme have you just completed?
- a. 1<sup>st</sup> Year \_\_\_\_\_
  - b. 2<sup>nd</sup> Year \_\_\_\_\_
  - c. 3<sup>rd</sup> Year \_\_\_\_\_
  - d. I am in my Internship \_\_\_\_\_
  - e. I am a Higher Diploma student \_\_\_\_\_

4. Are you a registered lactation consultant?

- a. Yes \_\_\_\_\_
- b. No \_\_\_\_\_
- c. I am working towards certification \_\_\_\_\_

5. Where do you currently work? OR Where was your most recent placement? Please tick

- a. \*\*\*\*\* Hospital \_\_\_\_\_
- b. \*\*\*\*\* Hospital \_\_\_\_\_
- c. \*\*\*\*\* Hospital \_\_\_\_\_
- d. Prefer not to say \_\_\_\_\_
- e. Other (please specify) \_\_\_\_\_

6. Although various breastfeeding positions may be suggested depending on individual assessment, when helping mothers establish breastfeeding what is the most frequent position that you tend to discuss? (Tick one only)

- a. Cradle hold \_\_\_\_\_
- d. Rugby hold \_\_\_\_\_

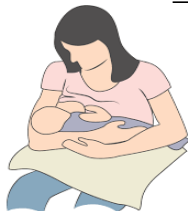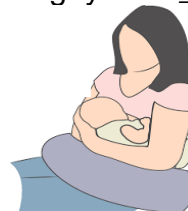

- b. Cross cradle hold \_\_\_\_\_

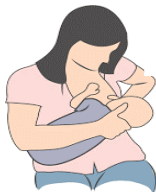

- e. Laid-back position \_\_\_\_\_

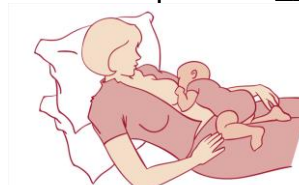

- c. Side lying \_\_\_\_\_

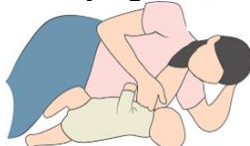

- f. Other (please specify)

---



---



---

7. Are you aware of the laid-back breastfeeding position as a way to help mothers to breastfeed their babies? Yes \_\_\_\_\_ No\* \_\_\_\_\_

\*If you have ticked no you have finished the questionnaire. Thank you. 😊

8. Where did you hear or learn about laid-back breastfeeding?  
(tick as many as apply)
- a. In my midwifery education \_\_\_\_\_
  - b. From other midwives \_\_\_\_\_
  - c. From lactation consultants \_\_\_\_\_
  - d. Self-directed study (i.e. reading, courses in lactation, conferences) \_\_\_\_
  - e. Breastfeeding support groups (La Leche League, Cuidiú Friends of BF) \_\_\_\_
  - f. Observing mothers and babies \_\_\_\_\_
  - g. Personal experience of breastfeeding \_\_\_\_\_
  - h. Other (please specify) \_\_\_\_\_
9. Have you ever had training/lectures specifically on laid-back breastfeeding, i.e. discussing positional stability for infants and the 20 primitive neonatal reflexes that this position activates?
- a. Yes, and I found it helpful for my practice \_\_\_\_\_
  - b. Yes, but I didn't find it useful \_\_\_\_\_
  - c. No \_\_\_\_\_
  - d. No, but I would like to \_\_\_\_\_
  - e. I am not sure \_\_\_\_\_
10. How often do you use a laid-back position when helping mothers?
- a. Never \_\_\_\_\_
  - b. Often \_\_\_\_\_
  - c. Occasionally \_\_\_\_\_
  - d. Always \_\_\_\_\_
11. Which of the following best describes the scenario where you would suggest laid-back breastfeeding? (Choose one)
- a. It's my "go-to" position, to encourage mothers' own skills first \_\_\_\_\_
  - b. Only when other positions do not seem helpful \_\_\_\_\_
  - c. I only tend to suggest it immediately after birth with skin to skin contact to encourage the first breastfeed \_\_\_\_\_
  - d. As an addition to other positions \_\_\_\_\_
  - e. I have never helped a mother use this position for breastfeeding \_\_\_\_\_
  - f. Other \_\_\_\_\_

12. If you have helped mothers using laid-back breastfeeding how successful has it been overall?

- a. Not at all – The baby rarely latches in this position \_\_\_\_\_
- b. Somewhat – But I have to attach the baby to the breast \_\_\_\_\_
- c. Mostly – I only make a few adjustments \_\_\_\_\_
- d. Nearly always – I only need to offer encouragement \_\_\_\_\_
- e. I have not helped a mother using this position \_\_\_\_\_

13. Laid-back breastfeeding is a position that can be done (tick all that apply):

- a. In bed \_\_\_\_\_
- b. In an armchair \_\_\_\_\_
- c. In an upright/kitchen chair \_\_\_\_\_
- d. On a sofa \_\_\_\_\_
- e. In public \_\_\_\_\_

14. How confident do you feel using the laid-back breastfeeding position with mothers? (circle one)

- •                    •                    •                    •                    •
- Very      Somewhat      Neutral      Not very      Not at all      Not applicable

15. Select any of the following statements you believe to be TRUE. Laid-back breastfeeding can (Tick all that apply)

- Be done with mother and baby fully clothed \_\_\_\_\_
- Ensure that gravity helps to keep the baby on the mother's body reducing the need for the mother to support the baby \_\_\_\_\_
- Reduce breast problems, such as sore nipples, cracked nipples, engorgement, and mastitis \_\_\_\_\_
- Result in greater infant weight gain \_\_\_\_\_
- Reduce the prescriptive pattern of *putting* the baby to the breast and allows the baby to 'head bob' and self-attach \_\_\_\_\_
- Be done with the mother only slightly reclined at a 65° angle (with 90° being completely upright) \_\_\_\_\_
- Reduce back, neck, and shoulder pain for the midwife from bending over to assist with latching by using a 'hands off' approach \_\_\_\_\_

16. Do you think there are any barriers that prevent a midwife from using a laid-back breastfeeding position with mothers? If so, please state.

---

---

---

***Thank you so much for taking the time to complete this questionnaire!  
Margaret McGuigan, 3<sup>rd</sup> year Student Midwife, DkIT***
