# Supplementary material for: Laid-back breastfeeding: knowledge, attitudes and practices of midwives and student midwives in Ireland
Source: Int Breastfeed J. 2024 Feb 19;19:13. doi: 10.1186/s13006-024-00619-y (PMC10877745; doi:10.1186/s13006-024-00619-y)
Supplement: Supplementary file 2 — Supplementary material 2. [file 13006_2024_619_MOESM2_ESM.pdf]

**Additional file 2: Specific training in laid-back breastfeeding and the impact of that on midwives and student midwives suggesting it.**

|                                                                                                     |                                                                                                               | Have you ever attended training, lectures, or conference sessions specifically on laid-back breastfeeding, i.e., discussing positional stability for infants and the 20 primitive neonatal reflexes that this position activates? |                                   |        |                         |               | Total  |
|-----------------------------------------------------------------------------------------------------|---------------------------------------------------------------------------------------------------------------|-----------------------------------------------------------------------------------------------------------------------------------------------------------------------------------------------------------------------------------|-----------------------------------|--------|-------------------------|---------------|--------|
|                                                                                                     |                                                                                                               | Yes, and I found it helpful for my practice                                                                                                                                                                                       | Yes, but I did not find it useful | No     | No, but I would like to | I am not sure |        |
| Which of the following best describes the scenario where you would suggest laid-back breastfeeding? | It's my "go-to" position, to encourage mothers' own skills first                                              | 8                                                                                                                                                                                                                                 | 0                                 | 0      | 2                       | 1             | 11     |
|                                                                                                     |                                                                                                               | 21.6%                                                                                                                                                                                                                             | 0.0%                              | 0.0%   | 2.2%                    | 16.7%         | 5.7%   |
|                                                                                                     | Only when other positions do not seem helpful                                                                 | 4                                                                                                                                                                                                                                 | 0                                 | 12     | 17                      | 1             | 34     |
|                                                                                                     |                                                                                                               | 10.8%                                                                                                                                                                                                                             | 0.0%                              | 21.1%  | 18.7%                   | 16.7%         | 17.7%  |
|                                                                                                     | I only tend to suggest it immediately after birth with skin to skin contact to encourage the first breastfeed | 4                                                                                                                                                                                                                                 | 1                                 | 8      | 15                      | 0             | 28     |
|                                                                                                     |                                                                                                               | 10.8%                                                                                                                                                                                                                             | 100.0%                            | 14.0%  | 16.5%                   | 0.0%          | 14.6%  |
|                                                                                                     | As an addition to other positions                                                                             | 20                                                                                                                                                                                                                                | 0                                 | 23     | 38                      | 2             | 83     |
|                                                                                                     |                                                                                                               | 54.1%                                                                                                                                                                                                                             | 0.0%                              | 40.4%  | 41.8%                   | 33.3%         | 43.2%  |
|                                                                                                     | I have never helped a mother use this position for breastfeeding                                              | 1                                                                                                                                                                                                                                 | 0                                 | 14     | 19                      | 2             | 36     |
|                                                                                                     |                                                                                                               | 2.7%                                                                                                                                                                                                                              | 0.0%                              | 24.6%  | 20.9%                   | 33.3%         | 18.8%  |
| Total                                                                                               |                                                                                                               | 37                                                                                                                                                                                                                                | 1                                 | 57     | 91                      | 6             | 192    |
|                                                                                                     |                                                                                                               | 100.0%                                                                                                                                                                                                                            | 100.0%                            | 100.0% | 100.0%                  | 100.0%        | 100.0% |
